# Supplementary material for: A lanthanide metal–organic framework containing a hydrazine group for highly sensitive luminescent sensing of formaldehyde gas
Source: Royal Society of Chemistry journal article supplement (doi:10.1039/d4ce00406j), 2024-01-01
Supplement: d4ce00406j1.pdf [file d4ce00406j1.pdf]

## Supporting Information

### A Lanthanide Metal-organic Framework Containing Hydrazine Group for Highly Sensitive Luminescent Sensing of Formaldehyde Gas

*Wenqian Cao<sup>‡</sup>, Fangying Teng<sup>‡</sup>, Yuanjing Cui\* and Guodong Qian\**

*State Key Laboratory of Silicon and Advanced Semiconductor Materials, ZJU-  
Hangzhou Global Scientific and Technological Innovation Center, School of  
Materials Science & Engineering, Zhejiang University, Hangzhou 310027, China. E-  
mail: cuiyj@zju.edu.cn, gdqian@zju.edu.cn*

## 1. Materials and methods

All of the solvents and reagents in this article were purchased from commercial companies and used without further purification unless otherwise stated. The organic ligand 2-hydrazine-terephthalic acid ( $\text{H}_2\text{BDC-NH-NH}_2$ ) was purchased from Jilin Scientific Research Technology Co., Ltd.  $\text{Eu}(\text{NO}_3)_3 \cdot 6\text{H}_2\text{O}$ ,  $\text{Gd}(\text{NO}_3)_3 \cdot 6\text{H}_2\text{O}$ ,  $\text{Tb}(\text{NO}_3)_3 \cdot 6\text{H}_2\text{O}$  and Hexanal were purchased from Anhui Zesheng Technology Co., Ltd. 2-fluorobenzoic acid (2-FBA) was purchased from Saen Chemical Technology (Shanghai) Co., Ltd. Nitric acid, n-hexane, anhydrous methanol, ethanol, isopropyl alcohol, acetone, benzene, toluene, ethylbenzene, formaldehyde and N,N-dimethylformamide (DMF, AR) were purchased from Sinopharmate Chemical Reagent Co., Ltd.

Single Crystal X-Ray Diffraction (SC-XRD) data were collected on a Bruker SMART APEX-II diffractometer equipped with Mo- $K\alpha$  radiation ( $\lambda = 0.71073 \text{ \AA}$ ). The structure data of Eu-BDC-NH-NH<sub>2</sub> was analyzed and refined by the direct method and full-matrix least-squares on  $F^2$  using the SHELX-2013 package. All nonhydrogen atoms were refined by Anisotropic thermal parameters, and all hydrogen atoms attached to C atoms were restrained with isotropic thermal parameters. Powder X-Ray Diffraction (PXRD) patterns were measured on an X'Pert PRO diffractometer at the range of 2~45° for  $2\theta$  with Cu  $K\alpha$  radiation at room temperature. The contents of C, H, and N in the as-synthesized crystals were analyzed applying a thermo scientific flash 2000 CHNS/O elemental analyzer. 77 K Nitrogen adsorption-desorption curves were recorded on a Micromeritics ASAP 2460 surface area analyzer. Thermogravimetric Analysis (TGA) were tested on a TG209 F3 Thermogravimetric Analyzer with a heating rate of 5 °C·min<sup>-1</sup> under a nitrogen atmosphere. Fourier Transform Infrared (FT-IR) spectra were characterized by a Thermo Fisher Nicolet iS10 spectrometer using potassium bromide pellet method. The low-temperature (77 K) time-resolved phosphorescent spectra of Gd-BDC-NH-NH<sub>2</sub> were recorded using an Edinburgh Instrument F920 transient fluorescence spectrometer. Photoluminescence (PL) spectra at room temperature for different samples were performed on a Hitachi F4600 fluorescence spectrometer. The fluorescent images of Eu-BDC-NH-NH<sub>2</sub> crystals were taken with Olympus IX-71 fluorescent inverted microscope ( $\lambda_{\text{ex}} = 365 \text{ nm}$ ). The mass spectrum (ESI-MS) was measured with an Agilent 7890A-5975C temperament combination instrument. Prior to the ESI-MS measurement, 15 mg of Eu-BDC-NH-NH<sub>2</sub> and FA-treated Eu-

BDC-NH-NH<sub>2</sub> were separately digested in 2 mL of HPLC grade methanol by the treatment with 200 μL of 48% HF. For HCHO-treated Eu-BDC-NH-NH<sub>2</sub>, the required amount of NaHCO<sub>3</sub> was added to the medium to attain neutral pH, filtered and then HCHO was introduced into the filtrate. For both samples, the organic layer was collected by filtration after 15 min of sonication. Then, the samples were further diluted by adding HPLC grade methanol for the ESI-MS measurements. Ultraviolet-Visible Absorption (UV-vis) spectra were performed on a Hitachi UV-2600 spectrometer.

## 2. Supplementary Tables.

**Table S1.** Crystallographic data and structure refinement results for Tb-BDC-NH-NH<sub>2</sub> (CCDC number: 2348622)

| Unit cell parameters                                                         | Tb-BDC-NH-NH <sub>2</sub>                                                       |
|------------------------------------------------------------------------------|---------------------------------------------------------------------------------|
| Formula                                                                      | C <sub>48</sub> H <sub>18</sub> Tb <sub>6</sub> N <sub>12</sub> O <sub>19</sub> |
| Temperature/K                                                                | 299(2)                                                                          |
| Crystal system                                                               | Cubic                                                                           |
| Space group                                                                  | <i>Fm</i> $\bar{3}$ <i>m</i>                                                    |
| <i>a</i> (Å)                                                                 | 21.5579(5)                                                                      |
| <i>b</i> (Å)                                                                 | 21.5579(5)                                                                      |
| <i>c</i> (Å)                                                                 | 21.5579(5)                                                                      |
| $\alpha$ (°)                                                                 | 90                                                                              |
| $\beta$ (°)                                                                  | 90                                                                              |
| $\gamma$ (°)                                                                 | 90                                                                              |
| <i>V</i> (Å <sup>3</sup> )                                                   | 10018.9(7)                                                                      |
| <i>Z</i>                                                                     | 2                                                                               |
| <i>D<sub>c</sub></i> (g/cm <sup>3</sup> )                                    | 1.386                                                                           |
| $\mu$ (mm <sup>-1</sup> )                                                    | 1.54178                                                                         |
| <i>F</i> (000)                                                               | 3880                                                                            |
| $\Theta$ range (°)                                                           | 3.551 to 67.969                                                                 |
| Index ranges                                                                 | -20 ≤ <i>h</i> ≤ 20, -25 ≤ <i>k</i> ≤ 13, -21 ≤ <i>l</i> ≤ 22                   |
| Crystal size(mm <sup>3</sup> )                                               | 0.03 × 0.04 × 0.03                                                              |
| GOF on <i>F</i> <sup>2</sup>                                                 | 1.071                                                                           |
| <i>R</i> <sub>int</sub>                                                      | 0.0849                                                                          |
| <i>R</i> <sub>1</sub> , <i>wR</i> <sub>2</sub> [ <i>I</i> ≥ 2σ ( <i>I</i> )] | 0.0692, 0.1889                                                                  |
| <i>R</i> <sub>1</sub> , <i>wR</i> <sub>2</sub> [all data]                    | 0.0727, 0.1855                                                                  |
| Largest diff. peak and hole (e Å <sup>-3</sup> )                             | 1.296, -1.087                                                                   |

**Table S2.** MOF-based formaldehyde fluorescence sensors.

| Materials                               | Detection limit | Medium                      | Sensing mode   | Ref.             |
|-----------------------------------------|-----------------|-----------------------------|----------------|------------------|
| <b>Eu-BDC-NH-NH<sub>2</sub></b>         | <b>41.7 ppb</b> | <b>gas</b>                  | <b>Turn-on</b> | <b>This work</b> |
| Ag <sup>+</sup> /Eu <sup>3+</sup> -1    | 51 ppb          | gas                         | Ratiometric    | [1]              |
| Eu/Zr-MOF                               | 200 ppb         | water                       | Turn-on        | [2]              |
| Eu <sup>3+</sup> @BioMOF-1              | 5500 ppb        | water                       | Turn-on        | [3]              |
| JNU-100                                 | 0.6 ppb         | Aqueous solution            | Turn-on        | [4]              |
| JNU-105-(NH <sub>2</sub> ) <sub>2</sub> | 1.87 ppb        | Aqueous solution            | Turn-on        | [5]              |
| Al-MIL-53-N <sub>2</sub> H <sub>3</sub> | 250 ppb         | HEPES (pH = 7.4)            | Turn-on        | [6]              |
| Eu-based MOF                            | 30 ppb          | CH <sub>3</sub> OH solution | Turn-off       | [7]              |

### 3. Supplementary Figures.

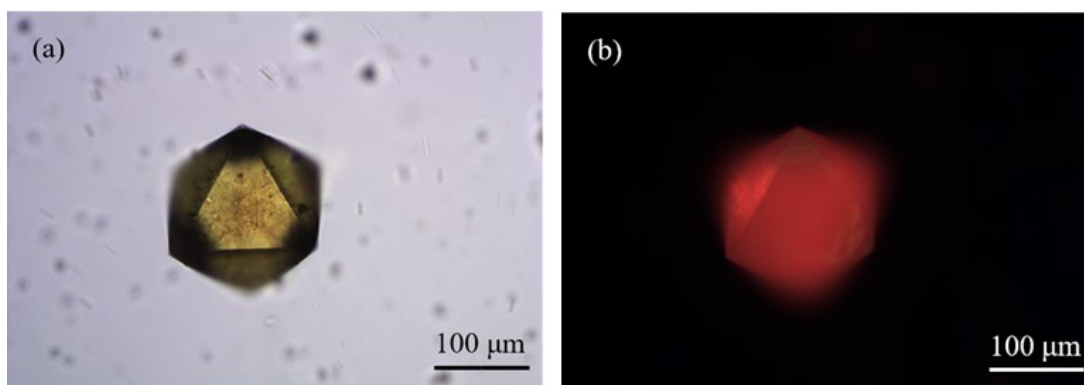

**Figure S1.** Micrographs of Eu-BDC-NH-NH<sub>2</sub> under (a) light and (b) dark field.

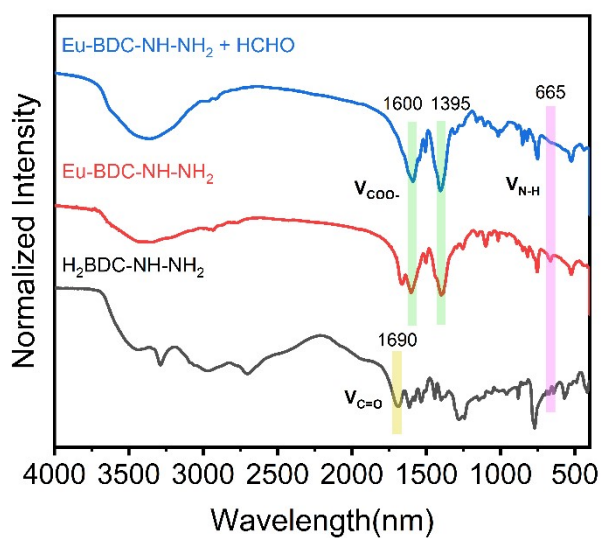

**Figure S2.** FTIR spectra of H<sub>2</sub>BDC-NH-NH<sub>2</sub>, Eu-BDC-NH-NH<sub>2</sub> and Eu-BDC-NH-NH<sub>2</sub> + HCHO.

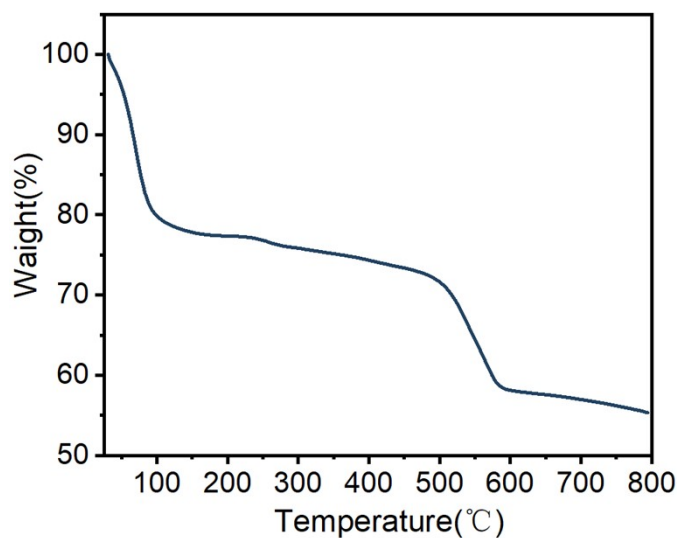

**Figure S3.** TGA curves for Eu-BDC-NH-NH<sub>2</sub>.

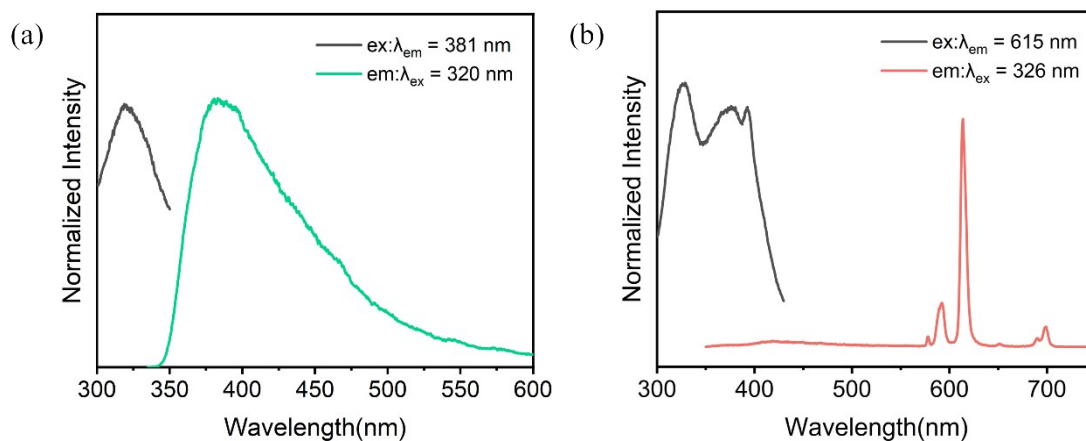

**Figure S4.** Solid-state excitation and emission spectra of (a) organic ligand H<sub>2</sub>BDC-N<sub>2</sub>H<sub>3</sub> and (b) Eu-BDC-NH-NH<sub>2</sub>.

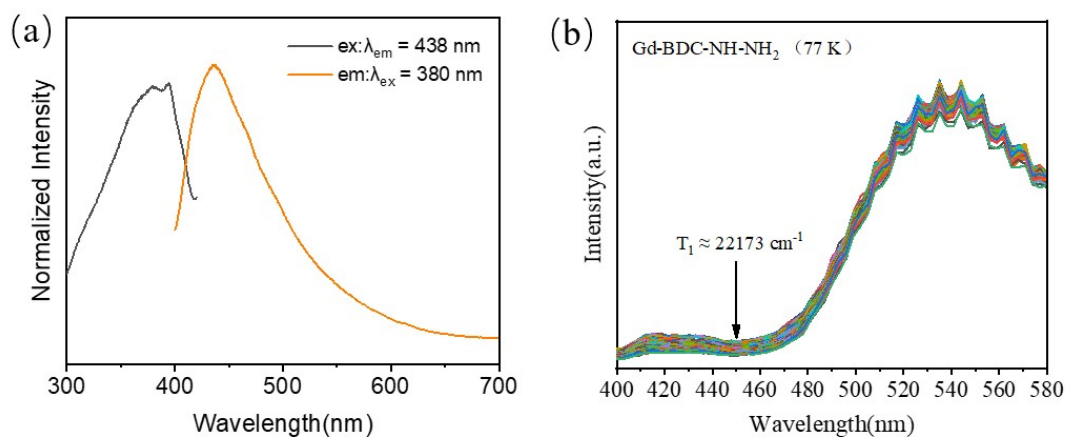

**Figure S5.** (a) Solid-state excitation and emission spectra of Gd-BDC-NH-NH<sub>2</sub>. (b) The phosphorescence spectrum of Gd-BDC-NH-NH<sub>2</sub> under 77 K.

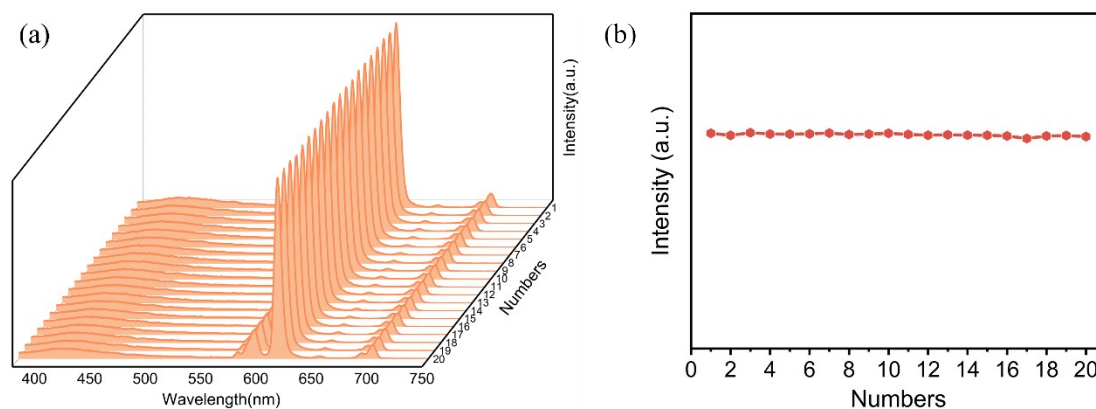

**Figure S6.** (a) The fluorescence spectra of Eu-BDC-NH-NH<sub>2</sub> in air were tested for 20 times under the excitation of 326 nm ultraviolet light. (b) The fluorescence intensity  $I_{615}$  of Eu-BDC-NH-NH<sub>2</sub> with the number of times.

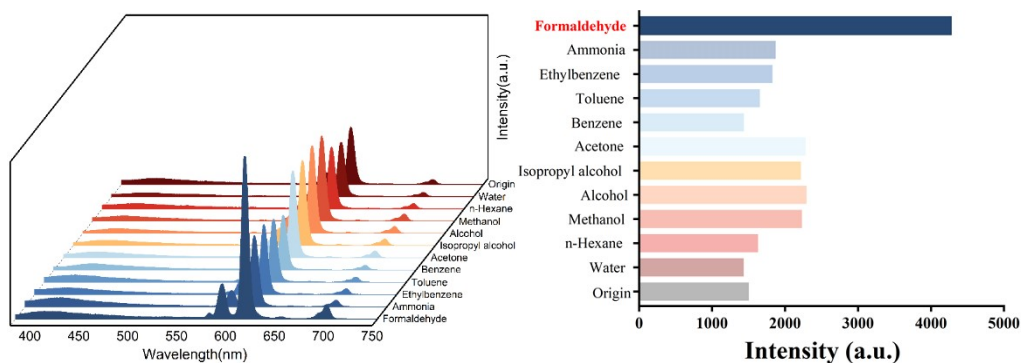

**Figure S7.** The emission spectra of Eu-BDC-NH-NH<sub>2</sub> exposed to different gases ( $\lambda_{ex} = 326$  nm).

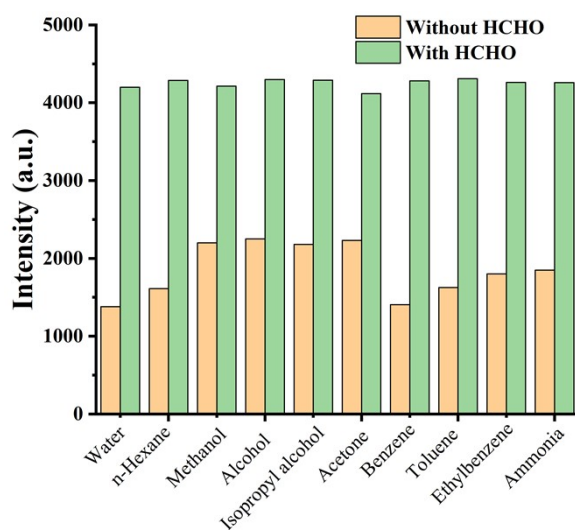

**Figure S8.** The response of the Eu-BDC-NH-NH<sub>2</sub> towards HCHO in the presence of interfering gases.

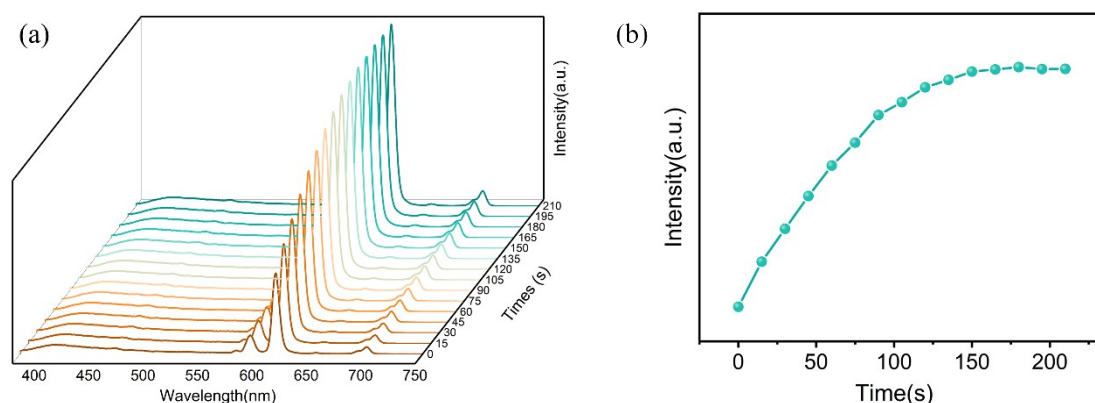

**Figure S9.** (a) Time dependent emission spectra of Eu-BDC-NH-NH<sub>2</sub> exposed to 200 ppb formaldehyde gas. (b) Fluorescence intensity of Eu-BDC-NH-NH<sub>2</sub> at 615 nm changes with time after exposed to 200 ppb formaldehyde gas. ( $\lambda_{ex} = 326$  nm)



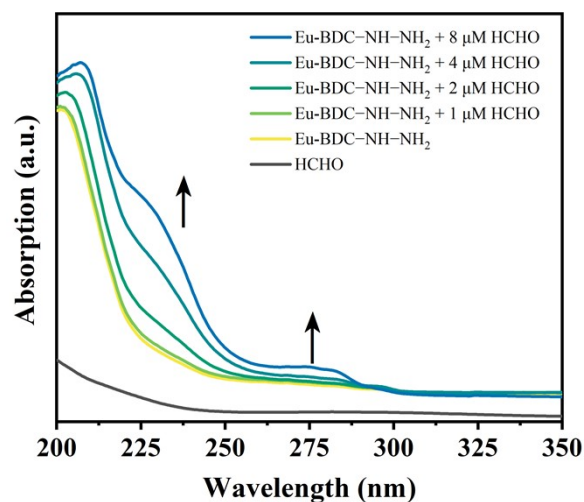

**Figure S10.** UV-vis absorption spectra of Eu-BDC-NH-NH<sub>2</sub> after adding different concentrations of formaldehyde (0–8 μM).

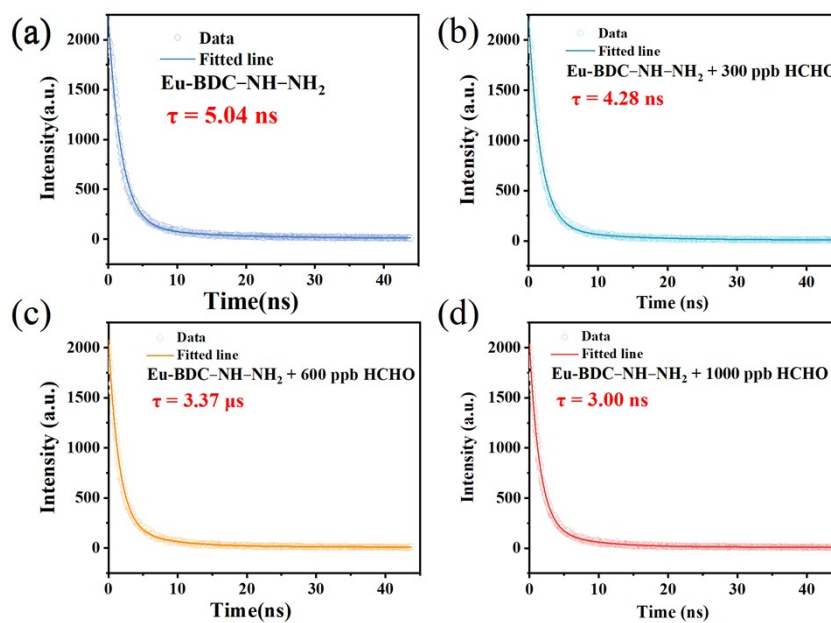

**Figure S11** Time-resolved radioluminescence decay curves at 440 nm emission of Eu-BDC-NH-NH<sub>2</sub> reacting with different concentration formaldehyde gas.

## References

- [1] Hao J N, Yan B. A dual-emitting 4d-4f nanocrystalline metal–organic framework as a self-calibrating luminescent sensor for indoor formaldehyde pollution[J]. *Nanoscale*, 2016, 8(23): 12047-12053.
- [2] Li C, Huang J, Zhu H, et al. Dual-emitting fluorescence of Eu/Zr-MOF for ratiometric sensing formaldehyde[J]. *Sensors and Actuators B: Chemical*, 2017, 253: 275-282.
- [3] Zhang Y, Yan B. A portable self-calibrating logic detector for gradient detection of formaldehyde based on luminescent metal organic frameworks[J]. *Journal of Materials Chemistry C*, 2019, 7(19): 5652-5657.
- [4] Wei Y B, Wang M J, Luo D, et al. Ultrasensitive and highly selective detection of formaldehyde via an adenine-based biological metal–organic framework[J]. *Materials Chemistry Frontiers*, 2021, 5(5): 2416-2424.
- [5] Li J L, Xiong X, Luo D, et al. Formaldehyde recognition through amination formation in a luminescent metal–organic framework[J]. *Chemical Communications*, 2022, 58(45): 6490-6493.
- [6] Nandi S, Sharma E, Trivedi V, et al. Metal–organic framework showing selective and sensitive detection of exogenous and endogenous formaldehyde[J]. *Inorganic Chemistry*, 2018, 57(24): 15149-15157.
- [7] Du J L, Wang X Y, Zou X Y, et al. Structures and luminescent sensors of mixed-counterions based salen-type lanthanide coordination polymers[J]. *Luminescence*, 2018, 33(6): 1040-1047.
